# Supplementary material for: The influence of small amounts of linear polycaprolactone chains on the crystallization of cyclic analogue molecules
Source: Royal Society of Chemistry journal article supplement (doi:10.1039/c6ra04823d), 2016-01-01
Supplement: c6ra04823d1.pdf [file c6ra04823d1.pdf]

## Supporting Information

### The influence of small amounts of linear polycaprolactone chains on the crystallization of cyclic analogue molecules

Juan V López<sup>a</sup>, Ricardo A Pérez-Camargo<sup>a,b</sup>, Boyu Zhang<sup>c</sup>, Scott M Grayson<sup>c</sup> and Alejandro J Müller<sup>\*a,b,d</sup>

#### Avrami Fit

The Avrami Fit was performed using an Origin<sup>®</sup> software application called *Polymer Crystallization Plugin*. This Origin<sup>®</sup> plugin was developed by Lorenzo *et al.* (*Polymer Testing* **26** (2007) 222). The Plugin is offered free upon request to Prof. A.J. Müller.

The data obtained by isothermal Differential Scanning Calorimetry (DSC) tests were used to perform the Avrami Fits. The parameters obtained are show from Table S1 to Table S2.

**Table S1.** Parameters Obtained by Fitting the Avrami Theory to the 3kg/mol samples (e.g., Data Shown in Figure 9a).

| Sample       | $T_c$ (°C) | $n$    | $K \times 10^5$<br>( $\text{min}^{-n}$ ) | $K^{1/n} \times 10^3$<br>( $\text{min}^{-1}$ ) | $\tau_{1/2t}$<br>( $\text{min}$ ) | $\tau_{1/2e}$<br>( $\text{min}$ ) | $1/\tau_{50\%}$<br>( $\text{min}^{-1}$ ) | $R^2$  |
|--------------|------------|--------|------------------------------------------|------------------------------------------------|-----------------------------------|-----------------------------------|------------------------------------------|--------|
| C-PCL 3k     | 45         | 3.6    | 20064                                    | 640                                            | 1.41                              | 1.45                              | 0.69                                     | 1.0000 |
|              | 46         | 3.2    | 10307                                    | 492                                            | 1.81                              | 1.83                              | 0.55                                     | 1.0000 |
|              | 47         | 3.4    | 2818                                     | 350                                            | 2.56                              | 2.60                              | 0.39                                     | 1.0000 |
|              | 48         | 3.7    | 501                                      | 239                                            | 3.72                              | 3.83                              | 0.26                                     | 1.0000 |
|              | 49         | 3.3    | 448                                      | 194                                            | 4.72                              | 4.82                              | 0.21                                     | 1.0000 |
|              | 50         | 3.3    | 129                                      | 133                                            | 6.74                              | 6.95                              | 0.14                                     | 1.0000 |
|              | 51         | 3.1    | 72                                       | 97                                             | 9.05                              | 9.20                              | 0.11                                     | 1.0000 |
|              | 52         | 3.2    | 18                                       | 68                                             | 13.08                             | 13.35                             | 0.08                                     | 1.0000 |
|              | 53         | 2.9    | 15                                       | 48                                             | 18.41                             | 18.52                             | 0.05                                     | 0.9999 |
| C/L 95/5 3k  | 40         | 3.1    | 112843                                   | 1040                                           | 0.86                              | 0.87                              | 1.15                                     | 1.0000 |
|              | 41         | 3.0    | 43520                                    | 758                                            | 1.17                              | 1.17                              | 0.86                                     | 0.9999 |
|              | 42         | 3.2    | 13280                                    | 532                                            | 1.69                              | 1.70                              | 0.59                                     | 1.0000 |
|              | 43         | 3.0    | 5644                                     | 384                                            | 2.30                              | 2.28                              | 0.44                                     | 0.9999 |
|              | 44         | 3.0    | 2043                                     | 273                                            | 3.24                              | 3.22                              | 0.31                                     | 0.9999 |
|              | 45         | 3.0    | 649                                      | 187                                            | 4.73                              | 4.73                              | 0.21                                     | 0.9999 |
|              | 46         | 3.1    | 181                                      | 130                                            | 6.87                              | 6.93                              | 0.14                                     | 1.0000 |
|              | 47         | 2.7    | 184                                      | 97                                             | 9.28                              | 9.25                              | 0.11                                     | 0.9999 |
| C/L 90/10 3k | 39         | 3.1    | 216424                                   | 1283                                           | 0.70                              | 0.72                              | 1.39                                     | 1.0000 |
|              | 40         | 3.5    | 74904                                    | 921                                            | 0.98                              | 1.02                              | 0.98                                     | 1.0000 |
|              | 41         | 3.3    | 31175                                    | 702                                            | 1.27                              | 1.28                              | 0.78                                     | 1.0000 |
|              | 42         | 3.3    | 12744                                    | 536                                            | 1.67                              | 1.68                              | 0.59                                     | 1.0000 |
|              | 43         | 3.5    | 3428                                     | 381                                            | 2.34                              | 2.37                              | 0.42                                     | 1.0000 |
|              | 44         | 3.7    | 984                                      | 287                                            | 3.20                              | 3.27                              | 0.31                                     | 1.0000 |
|              | 45         | 3.5    | 437                                      | 212                                            | 4.23                              | 4.33                              | 0.23                                     | 1.0000 |
|              | 46         | 3.8    | 63                                       | 144                                            | 6.20                              | 6.40                              | 0.16                                     | 1.0000 |
| 42           | 3.0        | 116916 | 1053                                     | 0.84                                           | 0.87                              | 1.15                              | 1.0000                                   |        |
| 43           | 3.4        | 35200  | 736                                      | 1.22                                           | 1.28                              | 0.78                              | 1.0000                                   |        |

|              |    |     |       |     |       |       |      |        |
|--------------|----|-----|-------|-----|-------|-------|------|--------|
| C/L 80/20 3k | 44 | 3.4 | 11989 | 536 | 1.68  | 1.77  | 0.57 | 1.0000 |
|              | 45 | 3.5 | 3281  | 377 | 2.38  | 2.50  | 0.40 | 1.0000 |
|              | 46 | 3.5 | 1200  | 283 | 3.24  | 3.42  | 0.29 | 1.0000 |
|              | 47 | 3.8 | 157   | 183 | 4.93  | 5.25  | 0.19 | 1.0000 |
|              | 48 | 3.9 | 29    | 124 | 7.13  | 7.62  | 0.13 | 0.9999 |
|              | 49 | 3.6 | 18    | 91  | 9.81  | 10.47 | 0.10 | 1.0000 |
|              | 50 | 3.8 | 3     | 65  | 13.92 | 14.58 | 0.07 | 1.0000 |
| L-PCL 3k     | 37 | 2.5 | 51106 | 765 | 1.13  | 1.22  | 0.82 | 0.9989 |
|              | 38 | 2.2 | 23699 | 520 | 1.61  | 1.70  | 0.59 | 0.9995 |
|              | 39 | 2.4 | 9735  | 379 | 2.30  | 2.45  | 0.41 | 0.9995 |
|              | 40 | 2.4 | 4022  | 262 | 3.33  | 3.57  | 0.28 | 0.9996 |
|              | 41 | 2.4 | 1429  | 170 | 5.02  | 5.42  | 0.18 | 0.9997 |
|              | 42 | 2.4 | 570   | 116 | 7.25  | 7.82  | 0.13 | 0.9996 |
|              | 43 | 2.4 | 236   | 80  | 11.18 | 12.03 | 0.08 | 0.9998 |

**Table S2.** Parameters Obtained by Fitting the Avrami Theory to 12 kg/mol samples (e.g., the Data Shown in Figure 9b).

| Sample        | $T_c$ (°C)    | $n$ | $K \times 10^5$<br>( $\text{min}^{-n}$ ) | $K^{1/n} \times 10^3$<br>( $\text{min}^{-1}$ ) | $\tau_{1/2t}$<br>(min) | $\tau_{1/2e}$<br>(min) | $1/\tau_{50\%}$<br>( $\text{min}^{-1}$ ) | $R^2$  |
|---------------|---------------|-----|------------------------------------------|------------------------------------------------|------------------------|------------------------|------------------------------------------|--------|
| C-PCL 12k     | 39            | 2.8 | 31986                                    | 666                                            | 1.32                   | 1.35                   | 0.74                                     | 1.0000 |
|               | 40            | 3.0 | 14227                                    | 522                                            | 1.69                   | 1.73                   | 0.58                                     | 1.0000 |
|               | 41            | 3.2 | 5862                                     | 412                                            | 2.19                   | 2.25                   | 0.44                                     | 1.0000 |
|               | 42            | 3.2 | 2652                                     | 322                                            | 2.81                   | 2.87                   | 0.35                                     | 1.0000 |
|               | 43            | 3.3 | 807                                      | 232                                            | 3.79                   | 3.88                   | 0.26                                     | 1.0000 |
|               | 44            | 3.2 | 384                                      | 176                                            | 4.98                   | 5.07                   | 0.20                                     | 1.0000 |
|               | 45            | 3.3 | 131                                      | 134                                            | 6.84                   | 6.97                   | 0.14                                     | 1.0000 |
|               | 46            | 3.3 | 43                                       | 95                                             | 9.69                   | 9.87                   | 0.10                                     | 1.0000 |
|               | 47            | 3.3 | 11                                       | 63                                             | 14.13                  | 14.32                  | 0.07                                     | 1.0000 |
|               | 48            | 3.7 | 0.7                                      | 40                                             | 21.92                  | 22.60                  | 0.04                                     | 1.0000 |
| 49            | 3.5           | 0.3 | 26                                       | 32.86                                          | 33.32                  | 0.03                   | 1.0000                                   |        |
| C/L 95/5 12k  | 36            | 2.3 | 56892                                    | 783                                            | 1.09                   | 1.05                   | 0.95                                     | 0.9998 |
|               | 37            | 2.3 | 30308                                    | 595                                            | 1.44                   | 1.37                   | 0.73                                     | 0.9998 |
|               | 38            | 2.3 | 15475                                    | 444                                            | 1.91                   | 1.83                   | 0.55                                     | 0.9999 |
|               | 39            | 2.3 | 8868                                     | 349                                            | 2.45                   | 2.35                   | 0.43                                     | 0.9999 |
|               | 40            | 2.5 | 3448                                     | 260                                            | 3.33                   | 3.27                   | 0.31                                     | 1.0000 |
|               | 41            | 2.5 | 1563                                     | 189                                            | 4.48                   | 4.42                   | 0.23                                     | 1.0000 |
|               | 42            | 2.5 | 898                                      | 152                                            | 5.85                   | 5.78                   | 0.17                                     | 1.0000 |
|               | 43            | 2.4 | 548                                      | 114                                            | 7.82                   | 7.67                   | 0.13                                     | 1.0000 |
|               | 44            | 2.6 | 139                                      | 80                                             | 11.29                  | 11.28                  | 0.09                                     | 1.0000 |
|               | 45            | 2.7 | 37                                       | 54                                             | 16.52                  | 16.58                  | 0.06                                     | 0.9999 |
| C/L 90/10 12k | 38            | 2.6 | 22017                                    | 559                                            | 1.57                   | 1.53                   | 0.65                                     | 1.0000 |
|               | 39            | 2.5 | 13825                                    | 453                                            | 1.92                   | 1.88                   | 0.53                                     | 0.9999 |
|               | 40            | 2.7 | 5467                                     | 341                                            | 2.56                   | 2.55                   | 0.39                                     | 1.0000 |
|               | 41            | 2.8 | 2216                                     | 257                                            | 3.36                   | 3.37                   | 0.30                                     | 1.0000 |
|               | 42            | 3.0 | 754                                      | 196                                            | 4.54                   | 4.57                   | 0.22                                     | 1.0000 |
|               | 43            | 3.2 | 201                                      | 144                                            | 6.27                   | 6.35                   | 0.16                                     | 1.0000 |
|               | 44            | 3.2 | 67                                       | 102                                            | 8.67                   | 8.77                   | 0.11                                     | 1.0000 |
|               | 45            | 3.3 | 15                                       | 69                                             | 12.48                  | 12.65                  | 0.08                                     | 1.0000 |
|               | 46            | 2.4 | 12                                       | 23                                             | 13.68                  | 13.48                  | 0.07                                     | 0.9998 |
|               | C/L 80/20 12k | 38  | 2.6                                      | 81841                                          | 926                    | 0.94                   | 0.95                                     | 1.05   |
| 39            |               | 3.0 | 32872                                    | 690                                            | 1.28                   | 1.32                   | 0.76                                     | 1.0000 |
| 40            |               | 3.1 | 13406                                    | 523                                            | 1.69                   | 1.75                   | 0.57                                     | 1.0000 |
| 41            |               | 3.4 | 4342                                     | 397                                            | 2.27                   | 2.33                   | 0.43                                     | 1.0000 |
| 42            |               | 3.4 | 1598                                     | 296                                            | 3.00                   | 3.07                   | 0.33                                     | 1.0000 |
| 43            |               | 3.3 | 704                                      | 223                                            | 3.98                   | 4.05                   | 0.25                                     | 1.0000 |
| 44            |               | 3.5 | 166                                      | 161                                            | 5.60                   | 5.70                   | 0.18                                     | 1.0000 |
| 45            |               | 3.8 | 25                                       | 113                                            | 8.10                   | 8.30                   | 0.12                                     | 1.0000 |
| 37            |               | 2.3 | 15450                                    | 444                                            | 1.90                   | 1.87                   | 0.54                                     | 0.9999 |

|           |    |     |      |     |       |       |      |        |
|-----------|----|-----|------|-----|-------|-------|------|--------|
| L-PCL 12k | 38 | 2.4 | 6806 | 326 | 2.61  | 2.58  | 0.39 | 0.9999 |
|           | 39 | 2.4 | 3289 | 241 | 3.52  | 3.50  | 0.29 | 1.0000 |
|           | 40 | 2.3 | 2052 | 185 | 4.54  | 4.50  | 0.22 | 1.0000 |
|           | 41 | 2.5 | 735  | 140 | 6.19  | 6.20  | 0.16 | 1.0000 |
|           | 42 | 2.4 | 411  | 101 | 8.25  | 8.30  | 0.12 | 1.0000 |
|           | 43 | 2.4 | 221  | 78  | 11.03 | 11.13 | 0.09 | 1.0000 |
|           | 44 | 2.3 | 128  | 55  | 15.38 | 15.43 | 0.07 | 1.0000 |

### Lauritzen and Hoffman Fit

This Origin® plugin can be used not only to perform Avrami Fits but also to perform the Lauritzen–Hoffman Crystallization Fits. The parameters obtained from the LH theory are shown in Table S3.

**Table S3.** Parameters Obtained from Fitting the Lauritzen and Hoffman Theory to the Data of Figure 7.

| Sample        | $K_g^\tau$ (K <sup>2</sup> ) | $\sigma_e$ (erg/cm <sup>2</sup> ) | $R^2$   |
|---------------|------------------------------|-----------------------------------|---------|
| C-PCL 3k      | 236319                       | 254                               | 0.99681 |
| C/L 3k 95/5   | 329576                       | 346                               | 0.99711 |
| C/L 3k 90/10  | 307817                       | 315                               | 0.99882 |
| C/L 3k 80/20  | 297044                       | 287                               | 0.98808 |
| L-PCL 3k      | 247079                       | 274                               | 0.99904 |
| C-PCL 12k     | 298825                       | 321                               | 0.99904 |
| C/L 12k 95/5  | 334344                       | 351                               | 0.99935 |
| C/L 12k 90/10 | 307017                       | 314                               | 0.99434 |
| C/L 12k 80/20 | 317940                       | 310                               | 0.99829 |
| L-PCL 12k     | 186314                       | 207                               | 0.99439 |

### Successive Self-Nucleation and Annealing (SSA)

The SSA experiments were performed with a fractionation windows of 3 °C in 3 kg/mol sample.

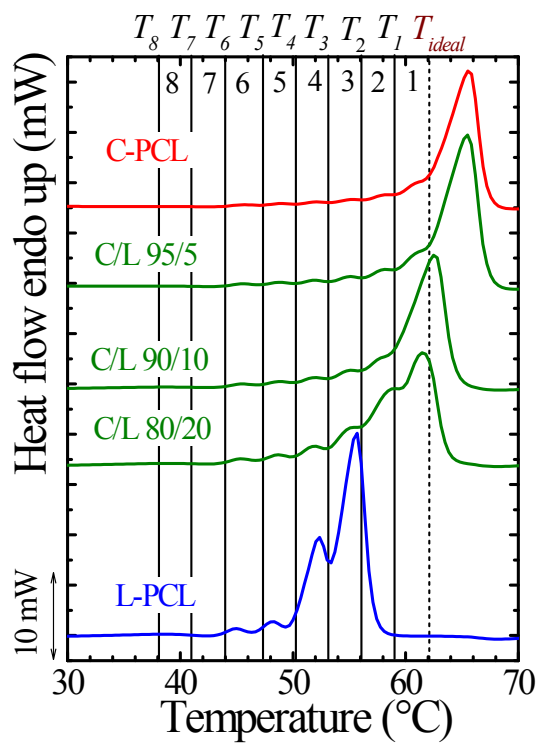

**Figure S1.** Final heating scan run after SSA thermal fractionation for C and L-PCLs and their C/L blends of 3kg/mol. The fractionation window was 3 °C. Red and blue curves represent C-PCL and L-PCL, respectively, whereas green curves represent the C/L blends.
